# Supplementary material for: Recognition of tRNAGln by Helicobacter pylori GluRS2—a tRNAGln-specific glutamyl-tRNA synthetase
Source: PubMed Central journal article supplement — Nucleic Acids Res. 2009 Sep 15;37(20):6942–9. doi: 10.1093/nar/gkp754 (PMC2777447; doi:10.1093/nar/gkp754), 2009-09-15
Supplement: gkp754_1.pdf [file gkp754_1.pdf]

# Supplementary Material

for

**Recognition of tRNA<sup>Gln</sup> by *Helicobacter pylori***

**GluRS2 – a tRNA<sup>Gln</sup>-Specific Glutamyl-tRNA**

**Synthetase**

**Keng-Ming Chang<sup>1,2</sup> and Tamara L. Hendrickson<sup>1\*</sup>**

<sup>1</sup> Department of Chemistry, Wayne State University, 5101 Cass Avenue, Detroit, MI 48202 and

<sup>2</sup>Department of Chemistry, Johns Hopkins University, 3400 North Charles St., Baltimore, MD 21218.

\*To whom correspondence should be addressed. Tel: 313-577-6914; Fax: 313-577-8822; Email: Tamara.Hendrickson@chem.wayne.edu

**Table S1 – Oligonucleotide sequences for construction of reported tRNA chimeras and mutants.**

|                |        |                                                             |
|----------------|--------|-------------------------------------------------------------|
| Chimera 1      | KM1F   | CCGGAATTTCGGCTCCTTCGCCAAGCGGTAAGGCACCAGGTTTTGGTCCTGGCATTCC  |
|                | KM1R   | CGCGGATCCTGGTGACTCCTCAAGGATTCGAACCTCGGAATGCCAGGACCAAAAC     |
| Chimera 2      | KM2F   | CCGGAATTCTGGGGTGTTCATCTAGTGGTTAGGATACCAGGTTTTGGTCCTGGCATTCC |
|                | KM2R   | CGCGGATCCTGGCTGGGGTGCAAGGATTCGAACCTCGGAATGCCAGGACCAAAAC     |
| V-loop         | KM34F  | CCAGGTTTTGGTCCTGGTTACCGAGGTTTCGAATCCTTGCACCCC               |
|                | KM34R  | GGGGTGCAAGGATTCGAACCTCGGTAACCAGGACCAAAACCTGG                |
| Chimera 3      | KM3F   | CCGGAATTCTGGGGTGTTCGCCAAGCGGTAAGGCACCACCCTTTGACGGTGGCATTCC  |
|                | KM3R   | CGCGGATCCTGGCTGGGGTGCAAGGATTCGAACCTCGGAATGCCACCGTCAAAG      |
| Chimera 4      | KM4F   | CCGGAATTCTGGGGTGTTCGCCAAGCGGTAAGGCACCAGGTTTTGGTCCTGGTTAC    |
|                | KM4R   | CGCGGATCCTGGCTGGGGTGAGGGGATTTGAACCCCTGTAACCAGGACCAAAACC     |
| D-stem         | KM18F  | GGAAACAGAATTCTGGGGTGTTCATCCAAGCGGTAAGG                      |
|                | KM18R  | CCTTACCGCTTGGATGACACCCAGAAATCTGTTTCC                        |
|                | KM19F  | CCAAGCGGTAAGGATACCAGGTTTTGGTCCTGGC                          |
|                | KM19R  | GCCAGGACCAAAACCTGGTATCCTTACCGCTTGG                          |
|                | KM20F  | GAATTCCTGGGGTGTTCATCTAAGCGGTAAGGATACCAGG                    |
|                | KM20R  | CCTGGTATCCTTACCGCTTAGATGACACCCAGAAATTC                      |
| D-loop         | KM21F  | GAATTCCTGGGGTGTTCGCCAGTGGTTAGGCACCAGGTTTTGGTCCTGGC          |
|                | KM21R  | GCCAGGACCAAAACCTGGTGCCTAACCCTGGCGACACCCAGAAATTC             |
| G36C           | KM17F  | GTAAGGCACCAGGTTTTCGTCTTGGCATTCCGAGG                         |
|                | KM17R  | CCTCGGAATGCCAGGACGAAAACCTGGTGCCTTAC                         |
| G37A           | KM43F  | GTAAGGCACCAGGTTTTGATCCTGGCATTCCGAGG                         |
|                | KM43R  | CCTCGGAATGCCAGGATCAAAACCTGGTGCCTTAC                         |
| U38C           | KM44F  | GTAAGGCACCAGGTTTTGGCCCTGGCATTCCGAGG                         |
|                | KM44R  | CCTCGGAATGCCAGGGCCAAAACCTGGTGCCTTAC                         |
| U1:A72--G1:C72 | KM36F1 | GGAAACAGAATTTCGGGGTGTTCGCCAAGCGGTAAGG                       |
|                | KM36R1 | CCTTACCGCTTGGCGACACCCCGAATTCGTTTCC                          |
|                | KM36F2 | GTTCGAATCCTTGCACCCCGCCAGGATCCGTC                            |
|                | KM36R2 | GACGGATCCTGGCGGGGGTGCAAGGATTCGAAC                           |
| G2:C71--G2:U71 | KM37F1 | GTTCGAATCCTTGCACCCTAGCCAGGATCCGTC                           |
|                | KM37R1 | GACGGATCCTGGCTAGGGTGCAAGGATTCGAAC                           |
| G3:C70--C3:G70 | KM38F1 | GGAAACAGAATTCTGCGGTGTTCGCCAAGCGGTAAGG                       |

|                |        |                                      |
|----------------|--------|--------------------------------------|
|                | KM38R1 | CCTTACCGCTTGGCGACACCGCAGAATTCTGTTTCC |
|                | KM38F2 | GTTCGAATCCTTGCACCGCAGCCAGGATCCGTC    |
|                | KM38R2 | GACGGATCCTGGCTGCGGTGCAAGGATTCGAAC    |
| G4:C69--U4:A69 | KM39F1 | GGAAACAGAATTCTGGTGTGTCGCCAAGCGGTAAGG |
|                | KM39R1 | CCTTACCGCTTGGCGACACACCAGAATTCTGTTTCC |
|                | KM39F2 | GTTCGAATCCTTGCACACCAGCCAGGATCCGTC    |
|                | KM39R2 | GACGGATCCTGGCTGGTGTGCAAGGATTCGAAC    |
| G5:C68--C5:G68 | KM40F1 | GGAAACAGAATTCTGGGCTGTCGCCAAGCGGTAAGG |
|                | KM40R1 | CCTTACCGCTTGGCGACAGCCCAGAATTCTGTTTCC |
|                | KM40F2 | GTTCGAATCCTTGCAGCCAGCCAGGATCCGTC     |
|                | KM40R2 | GACGGATCCTGGCTGGGCTGCAAGGATTCGAAC    |
| U6:A67--C6:G67 | KM41F1 | GGAAACAGAATTCTGGGGCGTCGCCAAGCGGTAAGG |
|                | KM41R1 | CCTTACCGCTTGGCGACGCCCCAGAATTCTGTTTCC |
|                | KM41F2 | GTTCGAATCCTTGCGCCCCAGCCAGGATCCGTC    |
|                | KM41R2 | GACGGATCCTGGCTGGGGCGCAAGGATTCGAAC    |
| G7:C66--U7:A66 | KM42F1 | GGAAACAGAATTCTGGGGTTTCGCCAAGCGGTAAGG |
|                | KM42R1 | CCTTACCGCTTGGCGAAACCCCAGAATTCTGTTTCC |
|                | KM42F2 | GTTCGAATCCTTGAACCCAGCCAGGATCCGTC     |
|                | KM42R2 | GACGGATCCTGGCTGGGGTTCAAGGATTCGAAC    |
| G73A           | KM43F1 | GAACCGCACCCCAACCAGGATCCGTCGACCTGC    |
|                | KM43F2 | GCAGGTCGACGGATCCTGGTTGGGGTGCGGTTC    |

**Table S2 – Final Sequences of all tRNA Chimeras and tRNA Mutants.** Mutations are shown in red. Native tRNA<sup>Gln</sup> is shown in black.

|               |                                                                              |
|---------------|------------------------------------------------------------------------------|
| Chimera 1     | GGCUCCUUCGCCAAGCGGUAAGGCACCAGGUUUUGGUCCUGGCAUUCGAGGUUCGAAUCCUUGAGGAGUCACCA   |
| Chimera 2     | UGGGGUGUCAUCUAGUGGUUAGGAUACCAGGUUUUGGUCCUGGUUACCGAGGUUCGAAUCCUUGCACCCCAGCCA  |
| Chimera 3     | UGGGGUGUCGCCAAGCGGUAAGGCACCACCCUUUGACGGUGGCAUUCGAGGUUCGAAUCCUUGCACCCCAGCCA   |
| Chimera 4     | UGGGGUGUCGCCAAGCGGUAAGGCACCAGGUUUUGGUCCUGGUUACAGGGGUUCAAAUCCCUACCCCAGCCA     |
| D-stem        | UGGGGUGUCAUCUAAGCGGUAAGGAUACCAGGUUUUGGUCCUGGUUACCGAGGUUCGAAUCCUUGCACCCCAGCCA |
| D-loop        | UGGGGUGUCGCCAGUGGUUAAGGCACCAGGUUUUGGUCCUGGUUACCGAGGUUCGAAUCCUUGCACCCCAGCCA   |
| G36C          | UGGGGUGUCGCCAAGCGGUAAGGCACCAGGUUUUCGUCCUGGCAUUCGAGGUUCGAAUCCUUGCACCCCAGCCA   |
| G37A          | UGGGGUGUCGCCAAGCGGUAAGGCACCAGGUUUUGAUCCUGGCAUUCGAGGUUCGAAUCCUUGCACCCCAGCCA   |
| U38C          | UGGGGUGUCGCCAAGCGGUAAGGCACCAGGUUUUGGCCUUGGCAUUCGAGGUUCGAAUCCUUGCACCCCAGCCA   |
| U1:A72→G1:C72 | GGGGUGUCGCCAAGCGGUAAGGCACCAGGUUUUGGUCCUGGCAUUCGAGGUUCGAAUCCUUGCACCCCAGCCA    |
| G2:C71→G2:U71 | UGGGGUGUCGCCAAGCGGUAAGGCACCAGGUUUUGGUCCUGGCAUUCGAGGUUCGAAUCCUUGCACCCUAGCCA   |
| G3:C70→C3:G70 | UGC GGUGUCGCCAAGCGGUAAGGCACCAGGUUUUGGUCCUGGCAUUCGAGGUUCGAAUCCUUGCACCGCAGCCA  |
| G4:C69→U4:A69 | UGGUUGUGUCGCCAAGCGGUAAGGCACCAGGUUUUGGUCCUGGCAUUCGAGGUUCGAAUCCUUGCACACCAGCCA  |
| G5:C68→C5:G68 | UGGGCUGUCGCCAAGCGGUAAGGCACCAGGUUUUGGUCCUGGCAUUCGAGGUUCGAAUCCUUGCAGCCCAGCCA   |
| U6:A67→C6:G67 | UGGGGCUGUCGCCAAGCGGUAAGGCACCAGGUUUUGGUCCUGGCAUUCGAGGUUCGAAUCCUUGCAGCCCAGCCA  |
| G7:C66→U7:A66 | UGGGGUUCGCCAAGCGGUAAGGCACCAGGUUUUGGUCCUGGCAUUCGAGGUUCGAAUCCUUGAACCCCAGCCA    |
| G73A          | UGGGGUGUCGCCAAGCGGUAAGGCACCAGGUUUUGGTCCTGGCAUUCGAGGUUCGAAUCCUUGCACCCCAACCA   |

**Table S3 – Quantification of tRNA expression levels using GluRS1 and GluRS2.** The values shown are the average of triplicate aminoacylation assays. Error analyses represent the standard error. The values in red were used to establish the concentrations of each tRNA. See accompanying manuscript for details. These tRNA mutants were not quantifiable using either GluRS1 and GluRS2; see accompanying manuscript for details.

| Mutant tRNAs                   | GluRS1 (pmoles/OD <sub>260</sub> ) | GluRS2 (pmoles/OD <sub>260</sub> ) |
|--------------------------------|------------------------------------|------------------------------------|
| H. pylori tRNA <sup>Glu1</sup> | 280 ± 50                           | 70 ± 20                            |
| H. pylori tRNA <sup>Glu2</sup> | 730 ± 150                          | 20 ± 10                            |
| H. pylori tRNA <sup>Gln</sup>  | 50 ± 10                            | 250 ± 40                           |
| Chimera 1                      | 210 ± 20                           | 50 ± 20                            |
| Chimera 2                      | 670 ± 140                          | 620 ± 110                          |
| Chimera 3                      | 80 ± 20                            | 330 ± 10                           |
| Chimera 4                      | 80 ± 10                            | 300 ± 10                           |
| D-stem                         | 260 ± 40                           | 170 ± 60                           |
| D-loop                         | 130 ± 30                           | 160 ± 10                           |
| G36C                           | 100 ± 50                           | 290 ± 100                          |
| G37A                           | 40 ± 10                            | 250 ± 10                           |
| U38C                           | 30 ± 5                             | 310 ± 30                           |
| G1:C72                         | 20 ± 10                            | 120 ± 10                           |
| G2:U71*                        | 40 ± 20                            | 40 ± 5                             |
| C3:G70                         | 40 ± 10                            | 130 ± 10                           |
| U4:A69*                        | 40 ± 20                            | 40 ± 5                             |
| C5:G68                         | 40 ± 20                            | 100 ± 30                           |
| C6:G67                         | 60 ± 10                            | 170 ± 40                           |
| U7:A66                         | 60 ± 5                             | 110 ± 10                           |
| G73A                           | 50 ± 10                            | 550 ± 70                           |

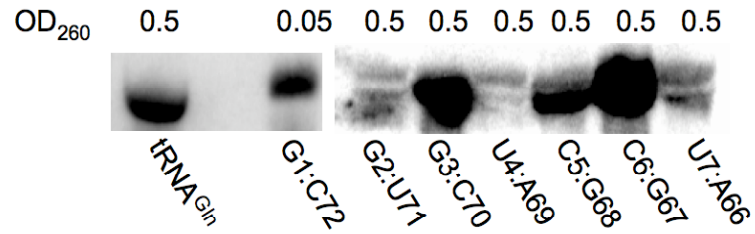

**Figure S1 – Northern blot of the acceptors stem mutants.** Each tRNA mutant has been blotted with one specific <sup>32</sup>P-labelled oligonucleotide. The amount of the each tRNA used in this experiment was measured by OD<sub>260</sub>. Each lane contains 0.5 or 0.05 OD<sub>260</sub> units of the corresponding tRNA. See Figure 6 and accompanying text for details.
